# Supplementary material for: Adherence to Timely Vaccinations in the United States
Source: Oxford University Press journal article supplement (doi:10.1542/peds.2019-0783), 2020-02-21
Supplement: peds_20190783supplementarydata.pdf [file peds_20190783supplementarydata.pdf]

## Supplemental Information

Following are several hypothetical examples of children who would be coded as following each pattern of vaccination and up-to-date status. The purpose of this supplement is to demonstrate the flexibility in the coding scheme as well as show how each of the coding schemes might result in a child who is up-to-date or not up-to-date (except selective pattern followers, who are always not up-to-date). In the following tables, time points that are coded as late are indicated with footnotes.

**SUPPLEMENTAL TABLE 6** Recommended, UTD

|                        | Child A                                                                                            |                                                 | Child B                                                                                                                                                                                                                                                                                 |                                           | Child C                                                                                                                                         |                                   |
|------------------------|----------------------------------------------------------------------------------------------------|-------------------------------------------------|-----------------------------------------------------------------------------------------------------------------------------------------------------------------------------------------------------------------------------------------------------------------------------------------|-------------------------------------------|-------------------------------------------------------------------------------------------------------------------------------------------------|-----------------------------------|
|                        | 20 mo Old                                                                                          |                                                 | 21 mo Old                                                                                                                                                                                                                                                                               |                                           | 23 mo Old                                                                                                                                       |                                   |
|                        | Date Received, d                                                                                   | Vaccination(s) Received                         | Date Received, d                                                                                                                                                                                                                                                                        | Vaccination(s) Received                   | Date Received, d                                                                                                                                | Vaccination(s) Received           |
| Time point 1: birth    | 0                                                                                                  | Hepatitis B                                     | 1                                                                                                                                                                                                                                                                                       | Hepatitis B                               | 35 <sup>a</sup>                                                                                                                                 | Hepatitis B <sup>a</sup>          |
| Time point 2: 2 mo     | 60                                                                                                 | DTaP<br>PCV<br>Hib<br>IPV<br>RV                 | 75                                                                                                                                                                                                                                                                                      | DTaP<br>PCV<br>Hib<br>IPV<br>RV           | 65                                                                                                                                              | DTaP<br>PCV<br>Hib<br>IPV<br>RV   |
| Time point 3: 4 mo     | 122                                                                                                | DTaP<br>PCV<br>Hib<br>IPV<br>RV                 | 150                                                                                                                                                                                                                                                                                     | DTaP<br>PCV<br>Hib<br>IPV<br>RV           | 133                                                                                                                                             | DTaP<br>PCV<br>Hib<br>IPV<br>RV   |
| Time point 4: 6 mo     | 184                                                                                                | Hepatitis B<br>DTaP<br>PCV<br>Hib<br>IPV<br>RV  | 220                                                                                                                                                                                                                                                                                     | DTaP<br>Hib<br>IPV                        | 195                                                                                                                                             | Hepatitis B<br>DTaP<br>PCV<br>IPV |
| Time point 5: 12–18 mo | 455                                                                                                | DTaP<br>Hib<br>PCV<br>MMR<br>VRC<br>Hepatitis A | 440                                                                                                                                                                                                                                                                                     | Hib<br>PCV<br>MMR<br>VRC                  | 380                                                                                                                                             | Hib<br>PCV<br>MMR<br>VRC          |
|                        | —                                                                                                  | —                                               | 540                                                                                                                                                                                                                                                                                     | Hepatitis B<br>DTaP<br>IPV<br>Hepatitis A | 470                                                                                                                                             | DTaP<br>Hepatitis A               |
| Vaccination pattern    | Routine                                                                                            |                                                 | Routine                                                                                                                                                                                                                                                                                 |                                           | Routine                                                                                                                                         |                                   |
| UTD status             | UTD                                                                                                |                                                 | UTD                                                                                                                                                                                                                                                                                     |                                           | UTD                                                                                                                                             |                                   |
| Explanation            | Child A received all vaccines at the recommended time, with as few vaccination visits as possible. |                                                 | Child B did not receive third RV vaccine and did not receive third PCV at month 6; both were assumed not to be needed. Time point 4 was not coded as recommended (too few vaccines were given), but all other time points were, so child B is overall following a recommended schedule. |                                           | Child C received the birth dose of hepatitis B vaccine late and so is not considered to be following the recommended schedule at time period 1. |                                   |

IPV, inactivated polio vaccine; RV, rotavirus vaccine; UTD, up-to-date; VRC, varicella vaccine; —, not applicable.

<sup>a</sup> Coded as late.

**SUPPLEMENTAL TABLE 7** Recommended, Not UTD

|                        | Child D                                                                                                                                                                                                                      |                                                 | Child E                                                                                                                                                                                                                                                                                                                                                                                                                                    |                                                |
|------------------------|------------------------------------------------------------------------------------------------------------------------------------------------------------------------------------------------------------------------------|-------------------------------------------------|--------------------------------------------------------------------------------------------------------------------------------------------------------------------------------------------------------------------------------------------------------------------------------------------------------------------------------------------------------------------------------------------------------------------------------------------|------------------------------------------------|
|                        | 30 mo Old                                                                                                                                                                                                                    |                                                 | 23 mo Old                                                                                                                                                                                                                                                                                                                                                                                                                                  |                                                |
|                        | Date Received, d                                                                                                                                                                                                             | Vaccination(s) Received                         | Date Received, d                                                                                                                                                                                                                                                                                                                                                                                                                           | Vaccination(s) Received                        |
| Time point 1: birth    | 0                                                                                                                                                                                                                            | Hepatitis B                                     | 0                                                                                                                                                                                                                                                                                                                                                                                                                                          | Hepatitis B                                    |
| Time point 2: 2 mo     | 60                                                                                                                                                                                                                           | DTaP<br>PCV<br>Hib<br>IPV<br>RV                 | 60                                                                                                                                                                                                                                                                                                                                                                                                                                         | DTaP<br>PCV<br>Hib<br>IPV<br>RV                |
| Time point 3: 4 mo     | 122                                                                                                                                                                                                                          | DTaP<br>PCV<br>Hib<br>IPV<br>RV                 | 122                                                                                                                                                                                                                                                                                                                                                                                                                                        | DTaP<br>PCV<br>Hib<br>IPV<br>RV                |
| Time point 4: 6 mo     | 184                                                                                                                                                                                                                          | Hepatitis B<br>DTaP<br>PCV<br>Hib<br>IPV<br>RV  | 184                                                                                                                                                                                                                                                                                                                                                                                                                                        | Hepatitis B<br>DTaP<br>PCV<br>Hib<br>IPV<br>RV |
| Time point 5: 12–18 mo | 455                                                                                                                                                                                                                          | DTaP<br>Hib<br>PCV<br>MMR<br>VRC<br>Hepatitis A | 455                                                                                                                                                                                                                                                                                                                                                                                                                                        | DTaP<br>Hib<br>PCV<br>VRC<br>Hepatitis A       |
| Vaccination pattern    | Recommended                                                                                                                                                                                                                  |                                                 | Recommended                                                                                                                                                                                                                                                                                                                                                                                                                                |                                                |
| UTD status             | Not UTD                                                                                                                                                                                                                      |                                                 | Not UTD                                                                                                                                                                                                                                                                                                                                                                                                                                    |                                                |
| Explanation            | Child A and child D follow the same vaccination schedule. However, because child D is 30 mo old, they need a second hepatitis A vaccine (should be delivered 6 mo after the first hepatitis A vaccine) to be considered UTD. |                                                 | Child A and child E follow the same vaccination schedule, except that child E has never received an MMR vaccine. Because adherence to the recommended schedule was assessed before adherence to a selective vaccination pattern, child E has been coded as following a recommended schedule on the basis of how many vaccines were received at each time point. However, they do not meet the requirements necessary to be considered UTD. |                                                |

IPV, inactivated polio vaccine; RV, rotavirus vaccine; UTD, up-to-date; VRC, varicella vaccine.

**SUPPLEMENTAL TABLE 8** Alternate and Other Patterns, UTD

|                        | Child F                                                                                                                                                                                                                                                                                                                                                                                                                                                                    |                                                           | Child G                                                                                                                                                                                                                                                                                                                                                                                                                                                                                                                                                                                    |                                                                                                                              | Child H                                                                                                                                                           |                                                                                                           |
|------------------------|----------------------------------------------------------------------------------------------------------------------------------------------------------------------------------------------------------------------------------------------------------------------------------------------------------------------------------------------------------------------------------------------------------------------------------------------------------------------------|-----------------------------------------------------------|--------------------------------------------------------------------------------------------------------------------------------------------------------------------------------------------------------------------------------------------------------------------------------------------------------------------------------------------------------------------------------------------------------------------------------------------------------------------------------------------------------------------------------------------------------------------------------------------|------------------------------------------------------------------------------------------------------------------------------|-------------------------------------------------------------------------------------------------------------------------------------------------------------------|-----------------------------------------------------------------------------------------------------------|
|                        | 24 mo Old                                                                                                                                                                                                                                                                                                                                                                                                                                                                  |                                                           | 23 mo Old                                                                                                                                                                                                                                                                                                                                                                                                                                                                                                                                                                                  |                                                                                                                              | 33 mo Old                                                                                                                                                         |                                                                                                           |
|                        | Date Received, d                                                                                                                                                                                                                                                                                                                                                                                                                                                           | Vaccination(s) Received                                   | Date Received, d                                                                                                                                                                                                                                                                                                                                                                                                                                                                                                                                                                           | Vaccination(s) Received                                                                                                      | Date Received, d                                                                                                                                                  | Vaccination(s) Received                                                                                   |
| Time point 1: birth    | 1                                                                                                                                                                                                                                                                                                                                                                                                                                                                          | Hepatitis B                                               | 0                                                                                                                                                                                                                                                                                                                                                                                                                                                                                                                                                                                          | Hepatitis B                                                                                                                  | 100 <sup>a</sup>                                                                                                                                                  | Hepatitis B <sup>a</sup>                                                                                  |
| Time point 2: 2 mo     | 55                                                                                                                                                                                                                                                                                                                                                                                                                                                                         | DTaP<br>PCV<br>Hib                                        | 40                                                                                                                                                                                                                                                                                                                                                                                                                                                                                                                                                                                         | DTaP<br>PCV<br>Hib<br>IPV<br>RV                                                                                              | 100 <sup>a</sup>                                                                                                                                                  | DTaP <sup>a</sup><br>PCV <sup>a</sup><br>Hib <sup>a</sup><br>IPV <sup>a</sup><br>RV <sup>a</sup>          |
|                        | 85                                                                                                                                                                                                                                                                                                                                                                                                                                                                         | IPV<br>RV                                                 | —                                                                                                                                                                                                                                                                                                                                                                                                                                                                                                                                                                                          | —                                                                                                                            | —                                                                                                                                                                 | —                                                                                                         |
| Time point 3: 4 mo     | 145                                                                                                                                                                                                                                                                                                                                                                                                                                                                        | DTaP<br>PCV<br>Hib                                        | 60                                                                                                                                                                                                                                                                                                                                                                                                                                                                                                                                                                                         | DTaP<br>PCV<br>Hib<br>IPV<br>RV                                                                                              | 160 <sup>a</sup>                                                                                                                                                  | DTaP <sup>a</sup><br>PCV <sup>a</sup><br>Hib <sup>a</sup><br>IPV <sup>a</sup><br>RV <sup>a</sup>          |
|                        | 175                                                                                                                                                                                                                                                                                                                                                                                                                                                                        | IPV<br>RV                                                 | —                                                                                                                                                                                                                                                                                                                                                                                                                                                                                                                                                                                          | —                                                                                                                            | —                                                                                                                                                                 | —                                                                                                         |
| Time point 4: 6 mo     | 225 <sup>a</sup>                                                                                                                                                                                                                                                                                                                                                                                                                                                           | DTaP <sup>a</sup><br>PCV <sup>a</sup><br>Hib <sup>a</sup> | 230 <sup>a</sup>                                                                                                                                                                                                                                                                                                                                                                                                                                                                                                                                                                           | Hepatitis B <sup>a</sup><br>DTaP <sup>a</sup><br>PCV <sup>a</sup><br>Hib <sup>a</sup><br>IPV <sup>a</sup><br>RV <sup>a</sup> | 400 <sup>a</sup>                                                                                                                                                  | Hepatitis B <sup>a</sup><br>DTaP <sup>a</sup><br>PCV <sup>a</sup><br>Hib <sup>a</sup><br>IPV <sup>a</sup> |
|                        | 255 <sup>a</sup>                                                                                                                                                                                                                                                                                                                                                                                                                                                           | IPV <sup>a</sup><br>RV <sup>a</sup>                       | —                                                                                                                                                                                                                                                                                                                                                                                                                                                                                                                                                                                          | —                                                                                                                            | —                                                                                                                                                                 | —                                                                                                         |
| Time point 5: 12–18 mo | 460                                                                                                                                                                                                                                                                                                                                                                                                                                                                        | PCV<br>Hib<br>Hepatitis B                                 | 455                                                                                                                                                                                                                                                                                                                                                                                                                                                                                                                                                                                        | DTaP<br>Hib<br>PCV<br>VRC<br>Hepatitis A                                                                                     | 600 <sup>a</sup>                                                                                                                                                  | DTaP <sup>a</sup><br>Hib <sup>a</sup><br>PCV <sup>a</sup><br>VRC <sup>a</sup><br>Hepatitis A <sup>a</sup> |
|                        | 500                                                                                                                                                                                                                                                                                                                                                                                                                                                                        | MMR<br>VRC                                                | —                                                                                                                                                                                                                                                                                                                                                                                                                                                                                                                                                                                          | —                                                                                                                            | —                                                                                                                                                                 | —                                                                                                         |
|                        | 550                                                                                                                                                                                                                                                                                                                                                                                                                                                                        | DTaP<br>IPV<br>Hepatitis A                                | —                                                                                                                                                                                                                                                                                                                                                                                                                                                                                                                                                                                          | —                                                                                                                            | 800 <sup>a</sup>                                                                                                                                                  | Hepatitis A <sup>a</sup>                                                                                  |
| Vaccination pattern    | Alternate, selective only                                                                                                                                                                                                                                                                                                                                                                                                                                                  |                                                           | Other                                                                                                                                                                                                                                                                                                                                                                                                                                                                                                                                                                                      |                                                                                                                              | Other                                                                                                                                                             |                                                                                                           |
| UTD status             | UTD                                                                                                                                                                                                                                                                                                                                                                                                                                                                        |                                                           | UTD                                                                                                                                                                                                                                                                                                                                                                                                                                                                                                                                                                                        |                                                                                                                              | UTD                                                                                                                                                               |                                                                                                           |
| Explanation            | Child F received all vaccinations necessary to be UTD but had 10 vaccination visits. Child F's first visit for time point 4 vaccines was at 225 d of age, so child F is flagged as having late initiation of vaccination at least once (time point 4 vaccines are considered late when initiated after 214 d of age). Time point 3 is not considered late because the first visit of time point 3 is at 145 d of age, within the on-time range for that group of vaccines. |                                                           | Child G receives all the vaccines necessary to be UTD but has several issues. Time point 3 is administered too early to be valid (perhaps child G is going on a trip abroad and their provider wanted them as protected as possible before travel), and time point 4 is administered late; therefore, both time points 3 and 4 are not considered to be following the recommended schedule. Thus, although time points 1, 2, and 5 follow the recommended pattern and child G has neither a restrictive nor selective vaccination pattern, they are following another vaccination pattern. |                                                                                                                              | Child H receives all recommended vaccines but receives them late. Therefore, no time points follow a recommended schedule, nor are they selective or restrictive. |                                                                                                           |

IPV, inactivated polio vaccine; RV, rotavirus vaccine; UTD, up-to-date; VRC, varicella vaccine; —, not applicable.

<sup>a</sup> Coded as late.

**SUPPLEMENTAL TABLE 9** Alternate and Other, Not UTD

|                        | Child I                                                                                                                                                                                                                                                                     |                                                           | Child J                                                                                                                                   |                                                | Child K                                                                                                                                                                                                                                                                                                                                                                      |                                                           |
|------------------------|-----------------------------------------------------------------------------------------------------------------------------------------------------------------------------------------------------------------------------------------------------------------------------|-----------------------------------------------------------|-------------------------------------------------------------------------------------------------------------------------------------------|------------------------------------------------|------------------------------------------------------------------------------------------------------------------------------------------------------------------------------------------------------------------------------------------------------------------------------------------------------------------------------------------------------------------------------|-----------------------------------------------------------|
|                        | 24 mo Old                                                                                                                                                                                                                                                                   |                                                           | 21 mo Old                                                                                                                                 |                                                | 33 mo Old                                                                                                                                                                                                                                                                                                                                                                    |                                                           |
|                        | Date Received, d                                                                                                                                                                                                                                                            | Vaccination(s) Received                                   | Date Received, d                                                                                                                          | Vaccination(s) Received                        | Date received, d                                                                                                                                                                                                                                                                                                                                                             | Vaccination(s) Received                                   |
| Time point 1: birth    | 1                                                                                                                                                                                                                                                                           | Hepatitis B                                               | 0                                                                                                                                         | Hepatitis B                                    | —                                                                                                                                                                                                                                                                                                                                                                            | —                                                         |
| Time point 2: 2 mo     | 55                                                                                                                                                                                                                                                                          | DTaP<br>PCV<br>Hib                                        | 60                                                                                                                                        | DTaP<br>PCV<br>Hib<br>IPV                      | 55                                                                                                                                                                                                                                                                                                                                                                           | DTaP<br>PCV<br>Hib                                        |
|                        | 85                                                                                                                                                                                                                                                                          | IPV<br>RV                                                 | —                                                                                                                                         | —                                              | 85                                                                                                                                                                                                                                                                                                                                                                           | IPV<br>RV                                                 |
| Time point 3: 4 mo     | 145                                                                                                                                                                                                                                                                         | DTaP<br>PCV<br>Hib                                        | 122                                                                                                                                       | DTaP<br>PCV<br>Hib<br>IPV                      | 145                                                                                                                                                                                                                                                                                                                                                                          | DTaP<br>PCV<br>Hib                                        |
|                        | 175                                                                                                                                                                                                                                                                         | IPV<br>RV                                                 | —                                                                                                                                         | —                                              | 175                                                                                                                                                                                                                                                                                                                                                                          | IPV<br>RV                                                 |
| Time point 4: 6 mo     | 225 <sup>a</sup>                                                                                                                                                                                                                                                            | DTaP <sup>a</sup><br>PCV <sup>a</sup><br>Hib <sup>a</sup> | 184                                                                                                                                       | Hepatitis B<br>DTaP<br>PCV<br>Hib<br>IPV<br>RV | 225 <sup>a</sup>                                                                                                                                                                                                                                                                                                                                                             | DTaP <sup>a</sup><br>PCV <sup>a</sup><br>Hib <sup>a</sup> |
|                        | 255 <sup>a</sup>                                                                                                                                                                                                                                                            | IPV <sup>a</sup><br>RV <sup>a</sup>                       | —                                                                                                                                         | —                                              | 255 <sup>a</sup>                                                                                                                                                                                                                                                                                                                                                             | IPV <sup>a</sup><br>RV <sup>a</sup>                       |
| Time point 5: 12–18 mo | 460                                                                                                                                                                                                                                                                         | PCV<br>Hib                                                | 540                                                                                                                                       | DTaP<br>Hib<br>PCV<br>VRC<br>Hepatitis A       | 460                                                                                                                                                                                                                                                                                                                                                                          | PCV<br>Hib                                                |
|                        | 500                                                                                                                                                                                                                                                                         | MMR<br>VRC                                                | —                                                                                                                                         | —                                              | 500                                                                                                                                                                                                                                                                                                                                                                          | MMR<br>VRC                                                |
|                        | 550                                                                                                                                                                                                                                                                         | DTaP<br>IPV<br>Hepatitis A                                | —                                                                                                                                         | —                                              | 550                                                                                                                                                                                                                                                                                                                                                                          | DTaP<br>IPV<br>Hepatitis A                                |
| Vaccination pattern    | Alternate, restrictive only                                                                                                                                                                                                                                                 |                                                           | Alternate, selective only                                                                                                                 |                                                | Alternate, selective and restrictive                                                                                                                                                                                                                                                                                                                                         |                                                           |
| UTD status             | Not UTD                                                                                                                                                                                                                                                                     |                                                           | Not UTD                                                                                                                                   |                                                | Not UTD                                                                                                                                                                                                                                                                                                                                                                      |                                                           |
| Explanation            | Child I follows the same vaccination pattern as child F but never receives their final hepatitis B vaccine and so is not UTD. Because child I received at least 1 of each vaccine in the schedule, they are not considered to be following a selective vaccination pattern. |                                                           | Child J follows a vaccination pattern similar to child A but never receives rotavirus vaccine. Thus, they are both selective and not UTD. |                                                | Child K follows a vaccination pattern similar to child I but never receives any hepatitis B vaccine. Thus, child K is both selective (because they never receive hepatitis B vaccine) and restrictive (because they have >6 vaccination visits with 3 or fewer vaccines received at each visit). Additionally, child K is not UTD because they lack any hepatitis B vaccine. |                                                           |

IPV, inactivated polio vaccine; RV, rotavirus vaccine; UTD, up-to-date; VRC, varicella vaccine; —, not applicable.

<sup>a</sup> Coded as late.

**SUPPLEMENTAL TABLE 10** Other, Not UTD

|                        | Child L                                                                                                                                                                                                                                                                                                                                                                                                                                                                                                                                                           |                                                                               | Child M                                                                                                                                                                                                                                                                                                                                                                                                                                                                                                                      |                                                                                                           |
|------------------------|-------------------------------------------------------------------------------------------------------------------------------------------------------------------------------------------------------------------------------------------------------------------------------------------------------------------------------------------------------------------------------------------------------------------------------------------------------------------------------------------------------------------------------------------------------------------|-------------------------------------------------------------------------------|------------------------------------------------------------------------------------------------------------------------------------------------------------------------------------------------------------------------------------------------------------------------------------------------------------------------------------------------------------------------------------------------------------------------------------------------------------------------------------------------------------------------------|-----------------------------------------------------------------------------------------------------------|
|                        | 32 mo Old                                                                                                                                                                                                                                                                                                                                                                                                                                                                                                                                                         |                                                                               | 30 mo Old                                                                                                                                                                                                                                                                                                                                                                                                                                                                                                                    |                                                                                                           |
|                        | Date Received, d                                                                                                                                                                                                                                                                                                                                                                                                                                                                                                                                                  | Vaccination(s) Received                                                       | Date Received, d                                                                                                                                                                                                                                                                                                                                                                                                                                                                                                             | Vaccination(s) Received                                                                                   |
| Time point 1: birth    | 5                                                                                                                                                                                                                                                                                                                                                                                                                                                                                                                                                                 | Hepatitis B                                                                   | 0                                                                                                                                                                                                                                                                                                                                                                                                                                                                                                                            | Hepatitis B                                                                                               |
| Time point 2: 2 mo     | 70                                                                                                                                                                                                                                                                                                                                                                                                                                                                                                                                                                | DTaP<br>PCV<br>Hib<br>IPV<br>RV                                               | 60                                                                                                                                                                                                                                                                                                                                                                                                                                                                                                                           | DTaP<br>PCV<br>Hib<br>IPV<br>RV                                                                           |
| Time point 3: 4 mo     | 160                                                                                                                                                                                                                                                                                                                                                                                                                                                                                                                                                               | DTaP<br>PCV<br>Hib<br>IPV                                                     | 122                                                                                                                                                                                                                                                                                                                                                                                                                                                                                                                          | DTaP<br>PCV<br>Hib<br>IPV<br>RV                                                                           |
| Time point 4: 6 mo     | 250 <sup>a</sup>                                                                                                                                                                                                                                                                                                                                                                                                                                                                                                                                                  | DTaP <sup>a</sup><br>PCV <sup>a</sup><br>IPV <sup>a</sup><br>Hib <sup>a</sup> | 600 <sup>a</sup>                                                                                                                                                                                                                                                                                                                                                                                                                                                                                                             | Hepatitis B <sup>a</sup><br>DTaP <sup>a</sup><br>PCV <sup>a</sup><br>IPV <sup>a</sup>                     |
| Time point 5: 12–18 mo | 500                                                                                                                                                                                                                                                                                                                                                                                                                                                                                                                                                               | Hib<br>PCV                                                                    | 650 <sup>a</sup>                                                                                                                                                                                                                                                                                                                                                                                                                                                                                                             | DTaP <sup>a</sup><br>PCV <sup>a</sup><br>MMR <sup>a</sup><br>VRC <sup>a</sup><br>Hepatitis A <sup>a</sup> |
|                        | 580                                                                                                                                                                                                                                                                                                                                                                                                                                                                                                                                                               | MMR<br>Hepatitis A                                                            | —                                                                                                                                                                                                                                                                                                                                                                                                                                                                                                                            | —                                                                                                         |
|                        | 630                                                                                                                                                                                                                                                                                                                                                                                                                                                                                                                                                               | DTaP<br>IPV<br>Hepatitis B                                                    | 832 <sup>a</sup>                                                                                                                                                                                                                                                                                                                                                                                                                                                                                                             | Hepatitis A <sup>a</sup>                                                                                  |
| Vaccination pattern    | Other                                                                                                                                                                                                                                                                                                                                                                                                                                                                                                                                                             |                                                                               | Other                                                                                                                                                                                                                                                                                                                                                                                                                                                                                                                        |                                                                                                           |
| UTD status             | Not UTD                                                                                                                                                                                                                                                                                                                                                                                                                                                                                                                                                           |                                                                               | Not UTD                                                                                                                                                                                                                                                                                                                                                                                                                                                                                                                      |                                                                                                           |
| Explanation            | Child L only receives 1 rotavirus vaccination and 1 hepatitis A vaccination, so at their age, they cannot be UTD. Child L only has 2 time points that look like they are following the recommended schedule (time point 1 and time point 2) and so is not overall considered to be following the recommended schedule. Child L has 5 vaccination visits with $\leq 3$ vaccinations given, fewer than the 6 such visits that would be necessary to be considered restrictive. Child L is not considered selective because they receive at least 1 of each vaccine. |                                                                               | Child M follows the recommended schedule for their first 3 time points but then has a long break in vaccinations. Child M's time points 4 and 5 are both late and therefore do not fall into the recommended schedule's time frame. Additionally, child M does not receive their last 1 (or 2) dose of Hib vaccine and so is ultimately not UTD. Like Child L, child M is neither restrictive nor selective because they do not have 6 visits with $\leq 3$ vaccinations given, and they receive at least 1 of each vaccine. |                                                                                                           |

IPV, inactivated polio vaccine; RV, rotavirus vaccine; UTD, up-to-date; VRC, varicella vaccine; —, not applicable.

<sup>a</sup> Coded as late.

**SUPPLEMENTAL TABLE 11** Distribution of Insurance Variable Responses, NIS, 2014

|                                                              | Yes         | No            | Do Not Know | Refused  | Missing     |
|--------------------------------------------------------------|-------------|---------------|-------------|----------|-------------|
|                                                              | n (%)       | n (%)         | n (%)       | n (%)    | n (%)       |
| Employer or union                                            | 8321 (55.9) | 6270 (42.1)   | 91 (0.6)    | 15 (0.1) | 196 (1.3)   |
| Medicaid                                                     | 3236 (21.7) | 5441 (36.5)   | 82 (0.6)    | 6 (0.0)  | 6128 (41.2) |
| S-CHIP                                                       | 1391 (9.3)  | 7021 (47.1)   | 339 (2.3)   | 7 (0.1)  | 6135 (41.2) |
| Indian Health Service, Military, Tricare, CHAMPUS, CHAMPVA   | 920 (6.2)   | 13 483 (90.5) | 248 (1.7)   | 6 (0.0)  | 236 (1.6)   |
| Other                                                        | 991 (6.7)   | 13 624 (91.5) | 27 (0.2)    | 7 (0.1)  | 244 (1.6)   |
| Any time when child was not covered by any health insurance? | 1044 (7.0)  | 13 005 (87.3) | 97 (0.7)    | 5 (0.0)  | 742 (5.0)   |

CHAMPUS, Civilian Health and Medical Program of the Uniformed Services; CHAMPVA, Civilian Health and Medical Program of the Department of Veterans Affairs; S-CHIP, state Children's Health Insurance Program.

**SUPPLEMENTAL TABLE 12** Up-to-date Vaccination Status by Child's Age Group, NIS, 2014

|                              | Up-to-date <sup>a</sup> | Not Up-to-date |
|------------------------------|-------------------------|----------------|
|                              | <i>n</i> (%)            | <i>n</i> (%)   |
| Overall ( <i>n</i> = 14 893) | 8839 (58.3)             | 6084 (41.7)    |
| Age of child, mo             |                         |                |
| 19–23 ( <i>n</i> = 4407)     | 2780 (62.4)             | 1627 (37.6)    |
| 24–29 ( <i>n</i> = 4495)     | 2430 (53.8)             | 2065 (46.2)    |
| 30–35 ( <i>n</i> = 5991)     | 3629 (59.0)             | 2362 (41.0)    |

<sup>a</sup> Children who are up-to-date have received the following doses:  $\geq 4$  DTaP vaccine,  $\geq 3$  poliovirus vaccine,  $\geq 1$  measles-containing vaccine,  $\geq 3$  Hib vaccine,  $\geq 1$  hepatitis A vaccine ( $\geq 2$  for children  $>24$  mo of age),  $\geq 3$  hepatitis B vaccine,  $\geq 1$  varicella-containing vaccine,  $\geq 4$  PCV, and  $\geq 2$  rotavirus vaccine.
